# Supplementary material for: Differential adaptation to multi-stressed conditions of wine fermentation revealed by variations in yeast regulatory networks
Source: PubMed Central journal article supplement (PMC3870980; doi:10.1186/1471-2164-14-681), 2013-10-04

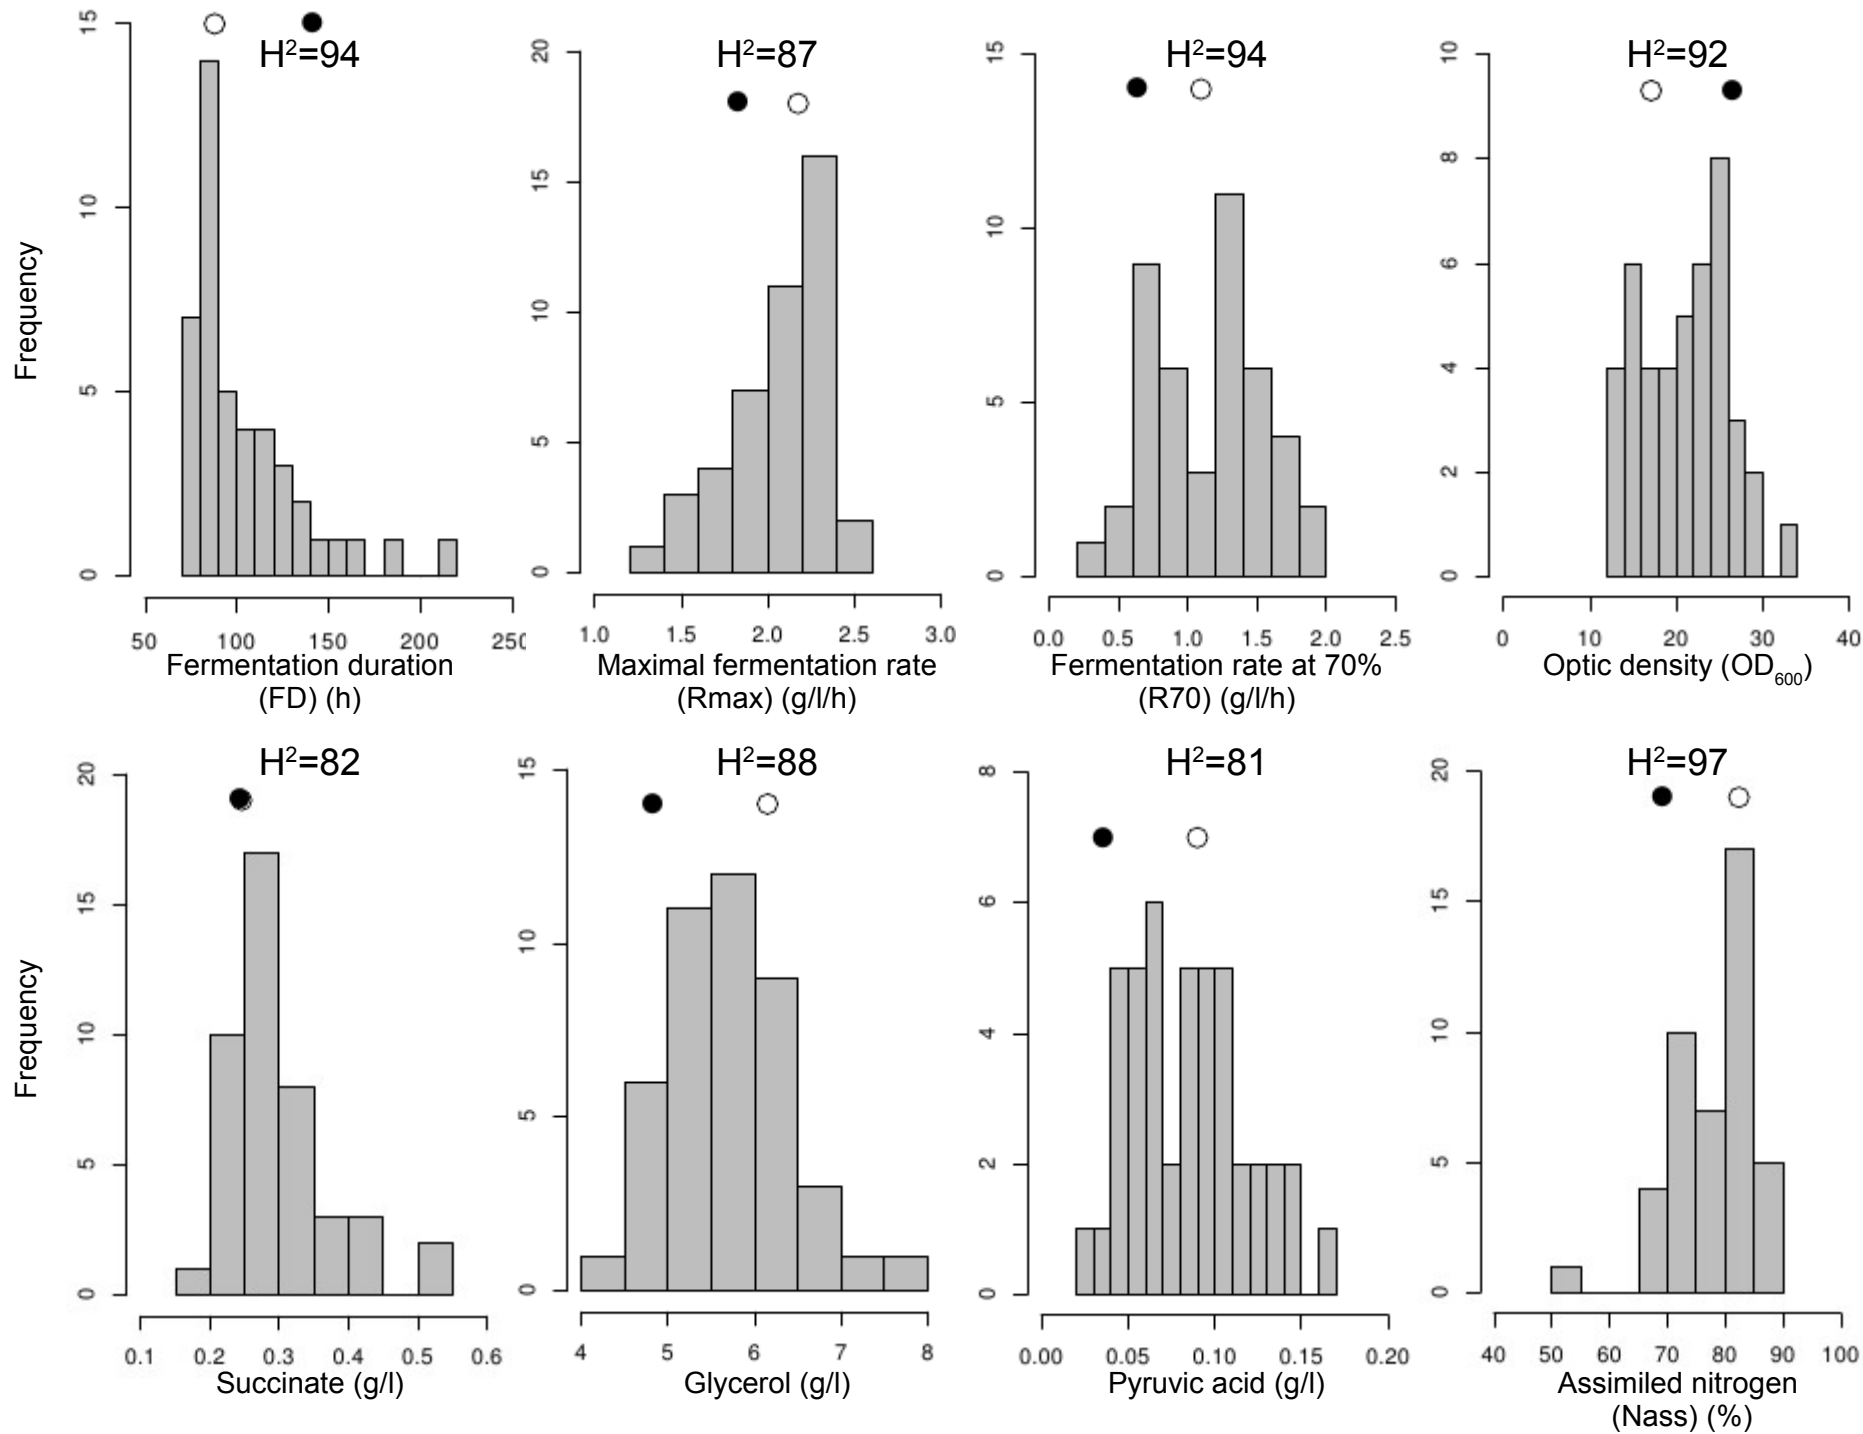

Supplement: 1471-2164-14-681-S1.pdf [file 1471-2164-14-681-S1.pdf]
