# Supplementary material for: Differential adaptation to multi-stressed conditions of wine fermentation revealed by variations in yeast regulatory networks
Source: PubMed Central journal article supplement (PMC3870980; doi:10.1186/1471-2164-14-681), 2013-10-04
Supplement: 1471-2164-14-681-S7.pdf [file 1471-2164-14-681-S7.pdf]

A

WAR1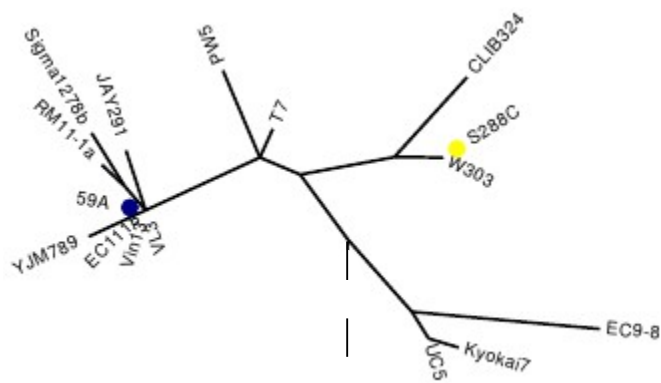

0.001

*S. paradoxus*

B

YRR1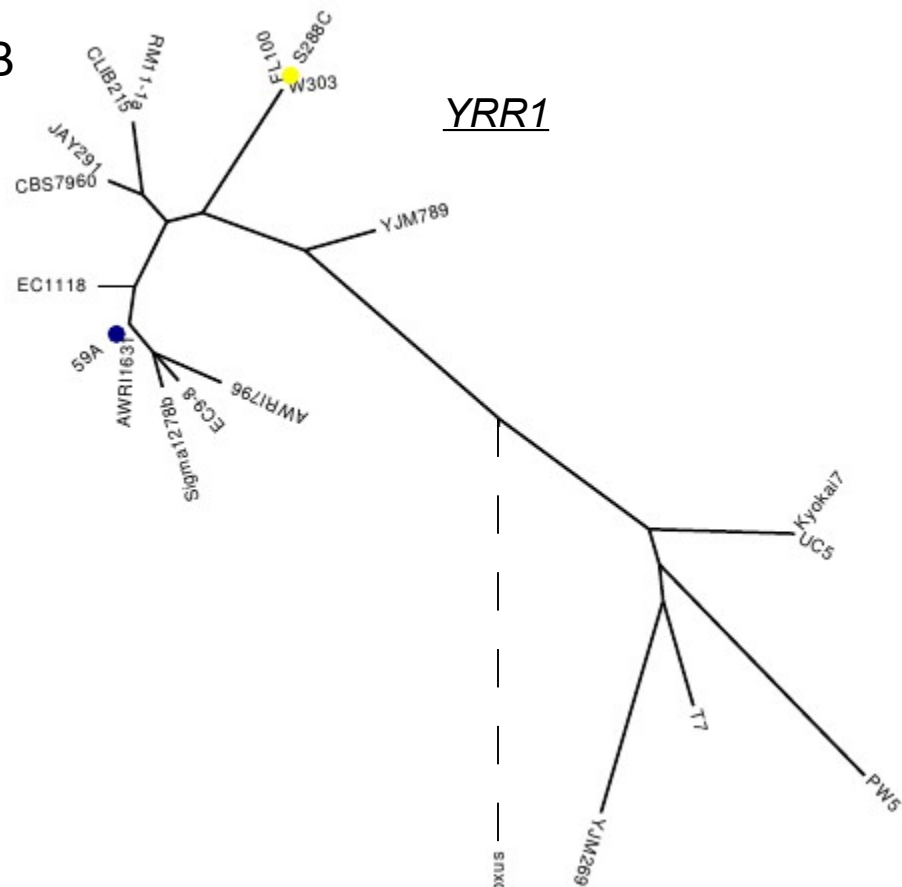

0.001

*S. paradoxus*
